# Supplementary material for: [Re(CO)3Cl(C5H4ClP)2] and [Re(CO)2Cl(C5H4ClP)3]: synthesis and characterization of two novel rhenium(i) phosphinine complexes
Source: Royal Society of Chemistry journal article supplement (doi:10.1039/c5ra25904e), 2016-01-01
Supplement: c5ra25904e1.pdf [file c5ra25904e1.pdf]

# **[Re(CO)<sub>3</sub>Cl(C<sub>5</sub>H<sub>4</sub>ClP)<sub>2</sub>] and [Re(CO)<sub>2</sub>Cl(C<sub>5</sub>H<sub>4</sub>ClP)<sub>3</sub>]: Synthesis and Characterization of Two Novel Rhenium(I) Phosphinine Complexes**

Manuela Hollering,<sup>a,b</sup> Richard O. Reithmeier,<sup>a</sup> Simon Meister,<sup>a</sup> Eberhardt Herdtweck,<sup>b</sup> Fritz E. Kühn,<sup>b,\*</sup>  
Bernhard Rieger<sup>a,\*</sup>

<sup>a</sup> WACKER-Chair of Macromolecular Chemistry, <sup>b</sup> Chair of Inorganic Chemistry/Molecular Catalysis, Catalysis Research  
Center, Technische Universität München, Ernst-Otto-Fischer-Straße 1, 85748 Garching b. München.

\* E-Mail for B.R.: [rieger@tum.de](mailto:rieger@tum.de), Fax: (+49)-89-289-13562;  
E-Mail for F.E.K.: [fritz.kuehn@ch.tum.de](mailto:fritz.kuehn@ch.tum.de), Fax: (+49)-89-289-13473.

## **Supporting Information**

### **Contents**

|                                   |    |
|-----------------------------------|----|
| 1. Analytical Data .....          | 2  |
| 2. Crystallographic Details ..... | 8  |
| 3. DFT Computed Data .....        | 17 |

## 1. Analytical Data

### *cis*-[Re(CO)<sub>3</sub>Cl(η<sup>1</sup>-C<sub>5</sub>H<sub>4</sub>ClP)<sub>2</sub>] (1)

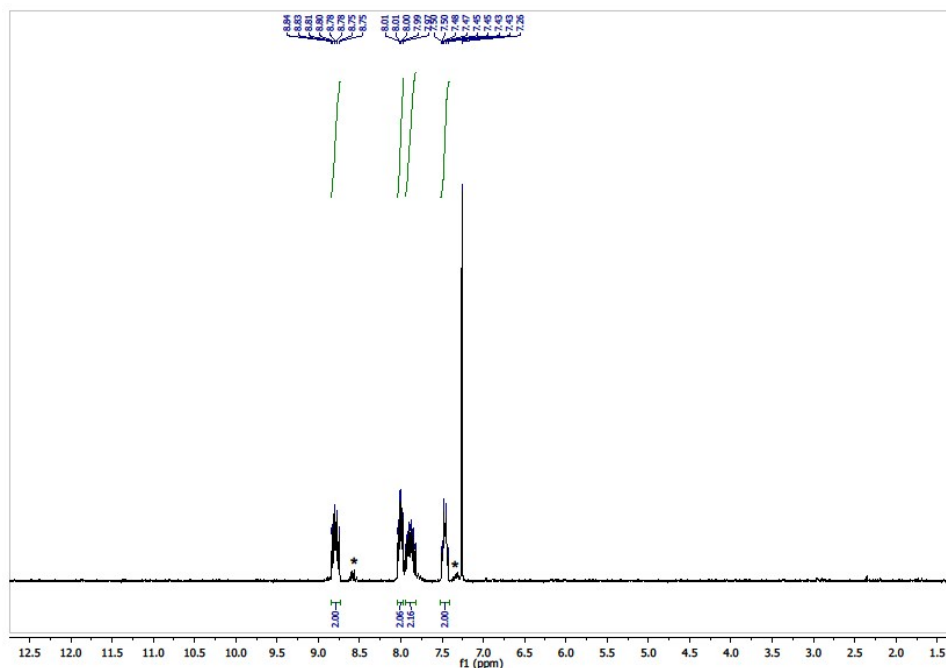

Figure S1. <sup>1</sup>H NMR of compound **1** (360 MHz, CDCl<sub>3</sub>): δ = 8.79 (ddd, <sup>2</sup>J<sub>H6-P</sub> = 20.5 Hz, <sup>3</sup>J<sub>H6-H5</sub> = 10.2 Hz, <sup>4</sup>J<sub>H6-H4</sub> = 1.3 Hz, 2H), 8.00 (ddt, <sup>3</sup>J<sub>H3-H4</sub> = 8.9 Hz, <sup>3</sup>J<sub>H3-P</sub> = 13.6 Hz, <sup>3</sup>J<sub>H3-H6</sub> = 1.0 Hz, 2H), 7.89 (dddd, <sup>3</sup>J<sub>H5-P</sub> = 24.9 Hz, <sup>3</sup>J<sub>H5-H6</sub> = 10.3 Hz, <sup>3</sup>J<sub>H5-H4</sub> = 8.1 Hz, <sup>4</sup>J<sub>H5-H3</sub> = 1.0 Hz, 2H), 7.47 (dd, <sup>3</sup>J<sub>H4-H5</sub> = 7.9 Hz, <sup>4</sup>J<sub>H4-H6</sub> = 1.3 Hz, 2H). \* Trace impurity of complex **2**.

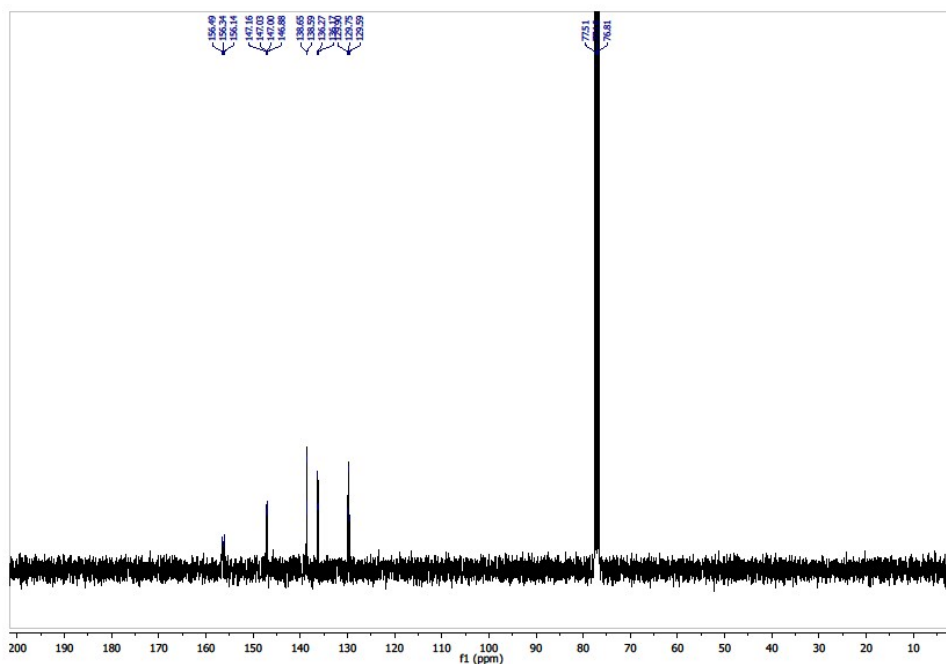

Figure S2.  $^{13}\text{C}$  NMR of compound **1** (90.6 MHz,  $\text{CDCl}_3$ ):  $\delta$  = 156.21 (dd,  $^1J_{\text{C-P}}$  = 18.9 Hz,  $^3J_{\text{C-P}}$  = 13.0 Hz,  $\text{C}_2$ ), 146.93 (dd,  $^1J_{\text{C-P}}$  = 15.0 Hz,  $^3J_{\text{C-P}}$  = 10.5 Hz,  $\text{C}_6$ ), 138.58 (t,  $^3J_{\text{C-P}}$  = 5.3 Hz,  $\text{C}_4$ ), 136.28 (d,  $^2J_{\text{C-P}}$  = 9.5 Hz,  $\text{C}_5$  or  $\text{C}_3$ ), 129.78 (t,  $^2J_{\text{C-P}}$  = 13.9 Hz,  $\text{C}_3$  or  $\text{C}_5$ ).

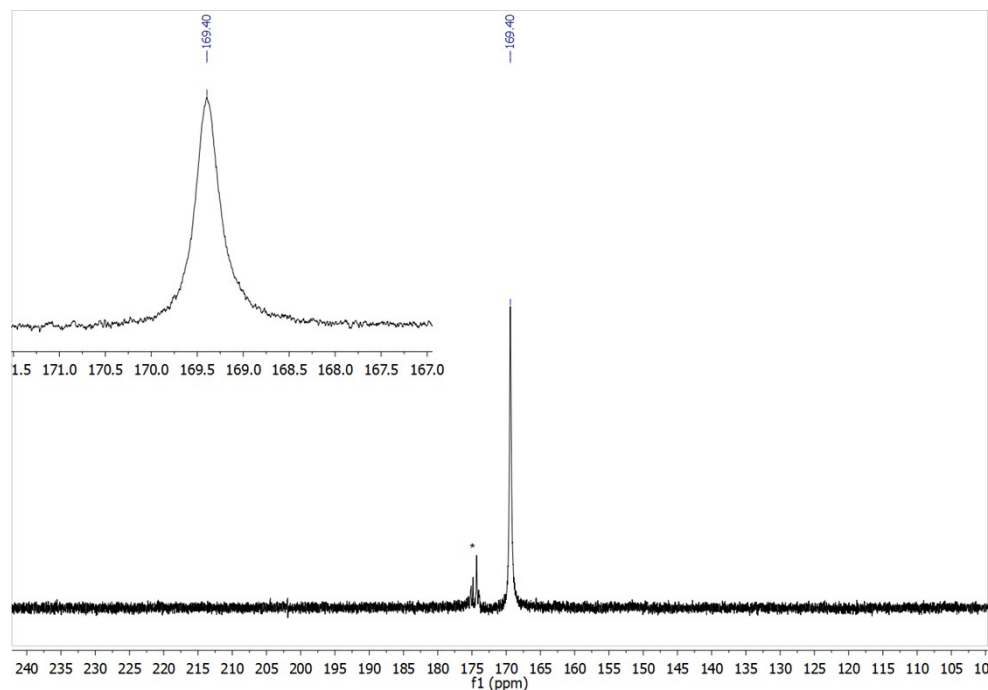

Figure S3.  $^{31}\text{P}$  NMR of compound **1** (145.8 MHz,  $\text{CDCl}_3$ ):  $\delta$  = 169.4. \* Trace impurity of complex **2**.

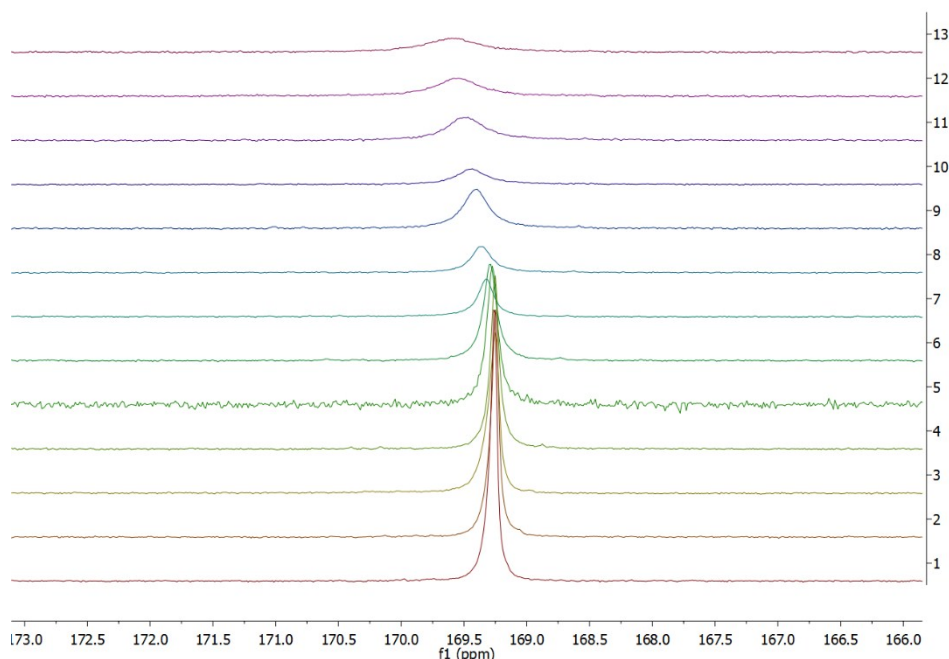

Figure S4. VT-NMR study of  $^{31}\text{P}$  NMR of compound **1** (145.8 MHz,  $\text{CDCl}_3$ ) from  $-60\text{ }^{\circ}\text{C}$  to  $60\text{ }^{\circ}\text{C}$  in steps of  $10\text{ }^{\circ}\text{C}$ . Spectrum 1 corresponds to the measurement at  $-60\text{ }^{\circ}\text{C}$ , spectrum 7 corresponds to  $0\text{ }^{\circ}\text{C}$ , spectrum 9 corresponds to  $20\text{ }^{\circ}\text{C}$  and spectrum 13 corresponds to  $60\text{ }^{\circ}\text{C}$ . The signal broadens significantly at elevated temperatures, while the signal sharpens at lower temperatures. Decoalescence is not observed in this temperature range.

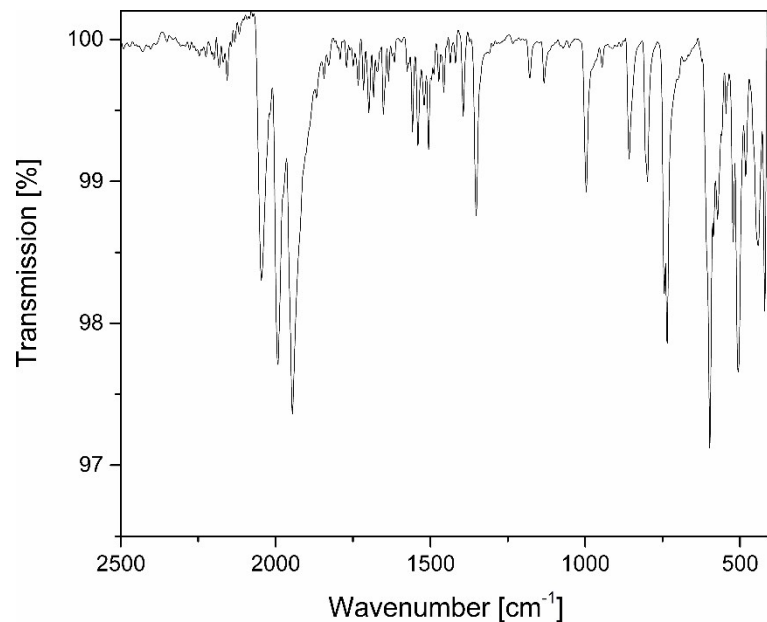

Figure S5. IR spectrum of compound **1**, with the carbonyl vibrations  $\nu_{\text{CO}} = 2046, 1992, 1945 \text{ cm}^{-1}$ .

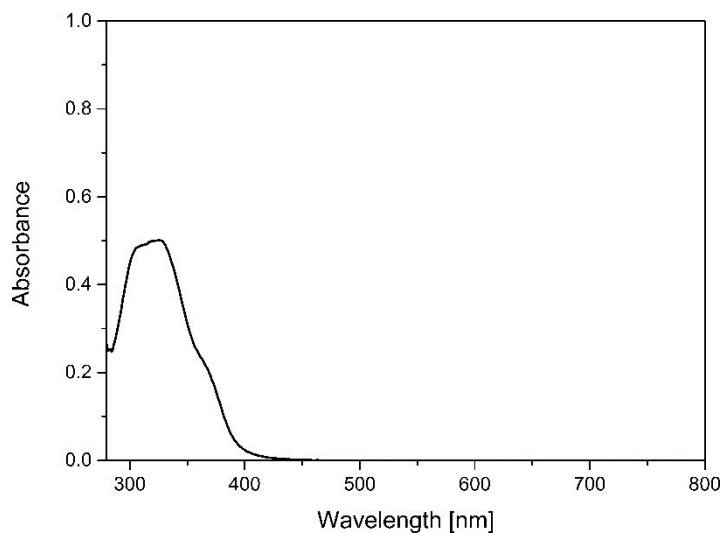

Figure S6. UV/Vis of compound **1** ( $\text{CH}_2\text{Cl}_2$ ):  $\lambda_{\text{max}}$  [nm] ( $\epsilon \cdot 10^3 [\text{L mol}^{-1} \text{ cm}^{-1}]$ ) = 310 (6.3).

*mer*-[Re(CO)<sub>2</sub>Cl( $\eta^1$ -C<sub>5</sub>H<sub>4</sub>CIP)<sub>3</sub>]**(2)**

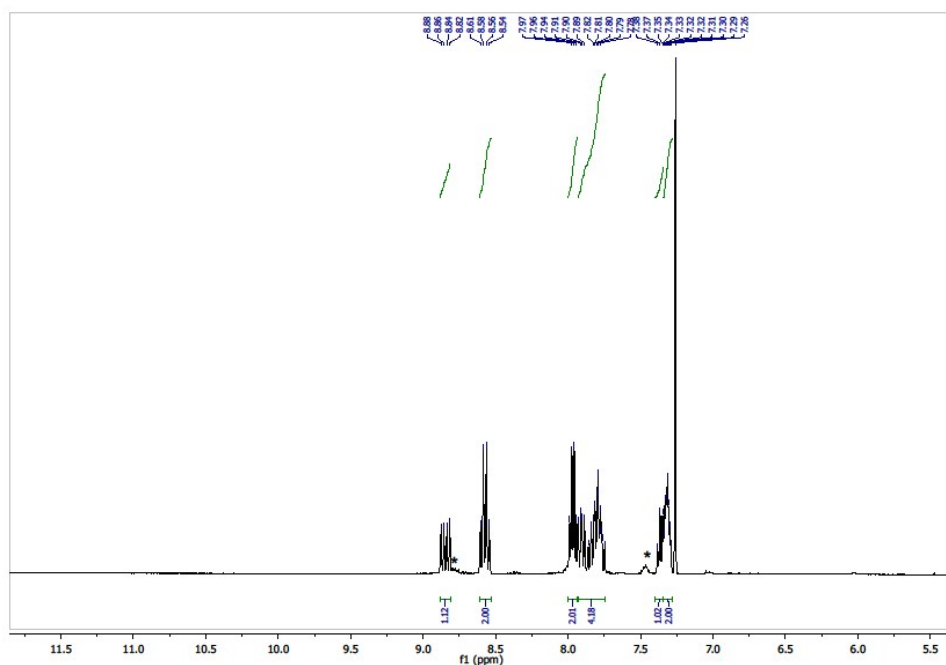

Figure S7. <sup>1</sup>H NMR of compound **2** (500 MHz, CDCl<sub>3</sub>):  $\delta$  = 8.85 (dd, <sup>2</sup>J<sub>H6'-p</sub> = 20.4 Hz, <sup>3</sup>J<sub>H6'-H5'</sub> = 10.2 Hz, 1H), 8.57 (qd, <sup>3</sup>J<sub>H6-H5</sub> = 10.1 Hz, <sup>4</sup>J<sub>H6-H4</sub> = 1.3 Hz, 2H), 7.97 (q, <sup>3</sup>J<sub>H3-p</sub> = 7.9 Hz, 2H), 7.84 (m, 4H), 7.37 (t, <sup>3</sup>J<sub>H4'-H5'</sub> = 8.2 Hz, 1H), 7.31 (dt, <sup>3</sup>J<sub>H4-H5</sub> = 7.4 Hz, <sup>4</sup>J<sub>H4-H6</sub> = 3.5 Hz, 2H). \*Trace impurity of complex **1**.

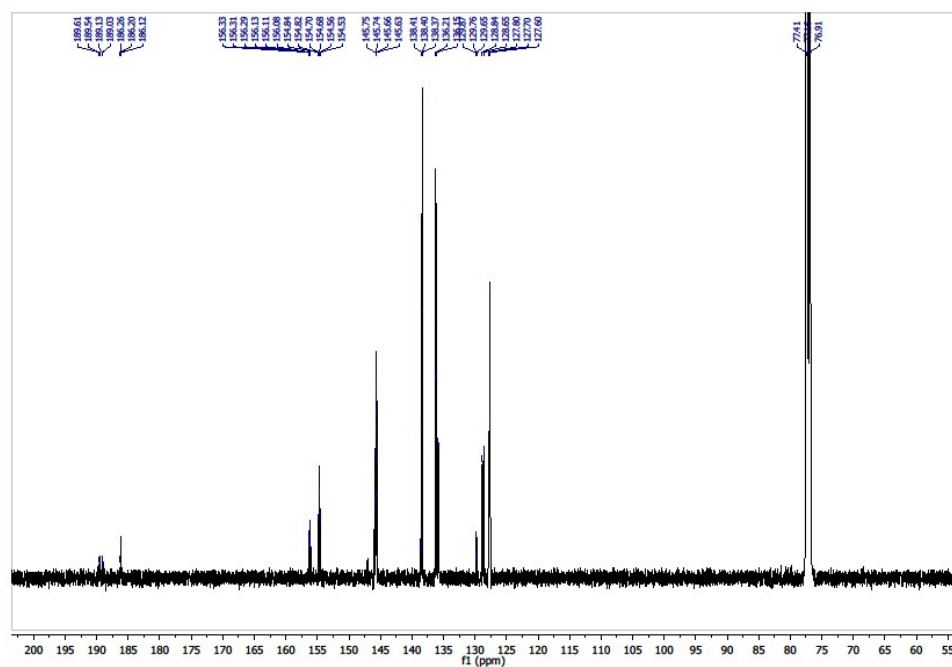

Figure S8. <sup>13</sup>C NMR of compound **2** (125.8 MHz, CDCl<sub>3</sub>):  $\delta$  = 189.33 (dd, <sup>2</sup>J<sub>C-p</sub> = 75 Hz, <sup>2</sup>J<sub>C-p</sub> = 11 Hz, CO), 186.19 (m, CO), 156.21 (dt, <sup>1</sup>J<sub>C-p</sub> = 26.2 Hz, J<sub>C-p</sub> = 2.72 Hz, C<sub>ar</sub>), 154.69 (td, <sup>1</sup>J<sub>C-p</sub> = 18.3 Hz, J<sub>C-p</sub> = 3.1 Hz, C<sub>ar</sub>), 145.73 (m, C<sub>ar</sub>), 138.39 (m, C<sub>ar</sub>), 136.21 (t, J<sub>C-p</sub> = 7.6 Hz, C<sub>ar</sub>), 135.8 (d, <sup>1</sup>J<sub>C-p</sub> = 16.9 Hz, C<sub>ar</sub>), 128.74 (t, J<sub>C-p</sub> = 24.3 Hz, C<sub>ar</sub>), 127.7 (d, J<sub>C-p</sub> = 12.7 Hz, C<sub>ar</sub>).

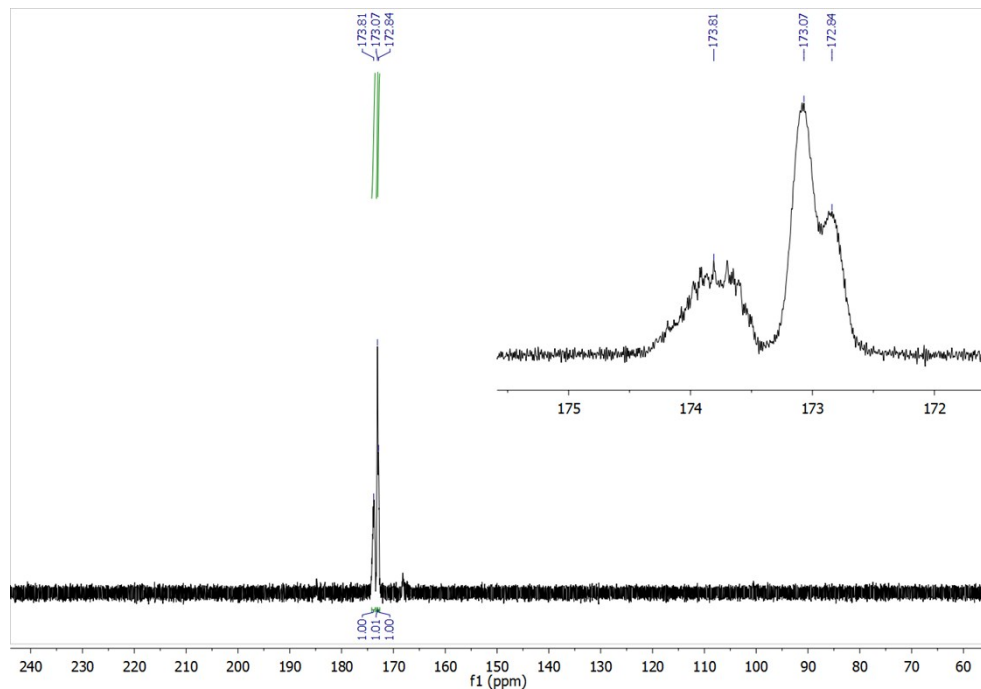

Figure S9.  $^{31}\text{P}$  NMR of compound **2** (202.6 MHz,  $\text{CDCl}_3$ ):  $\delta = 173.1$  (ps, 1P), 173.3 (pd,  $^2J_{\text{P-P trans}} = 190$  Hz, 2P).

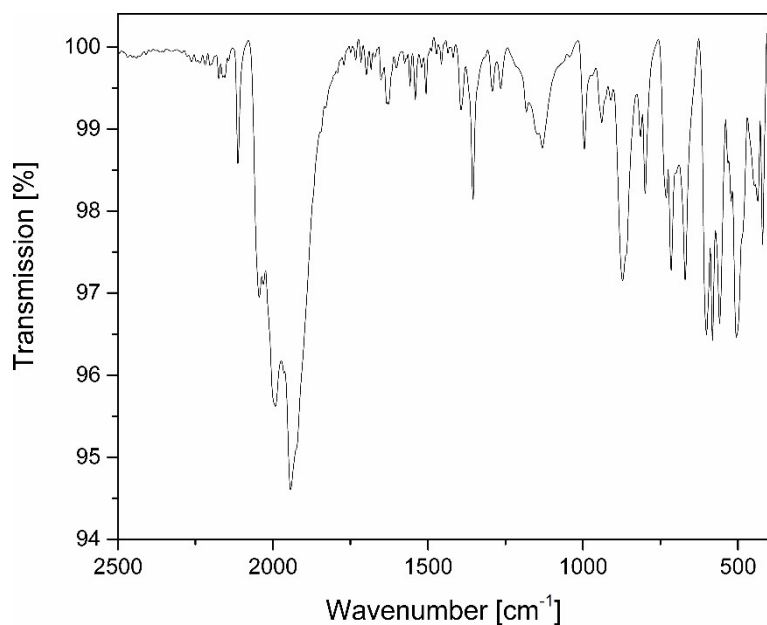

Figure S10. IR spectrum of a mixture of compound **1** and compound **2**, with the carbonyl vibrations  $\nu_{\text{CO}} = 1965, 1924$   $\text{cm}^{-1}$ . The IR spectrum could only be obtained as a mixture due to the formation of compound **2** besides compound **1**.

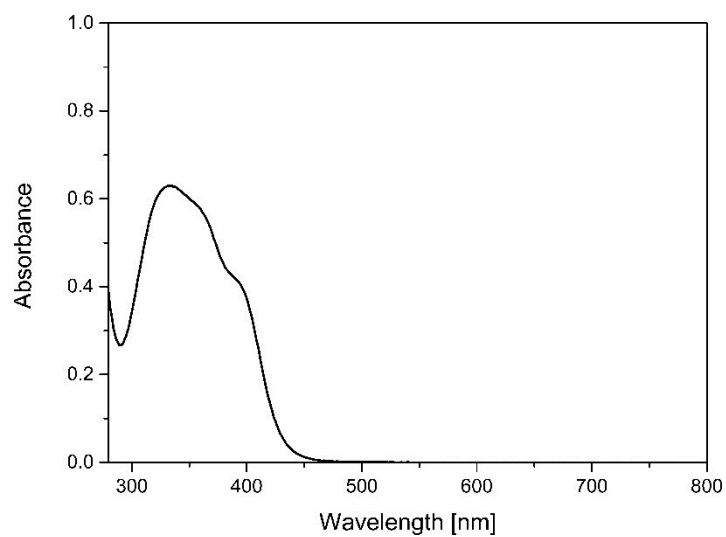

Figure S11. UV/Vis of compound **2** ( $\text{CH}_2\text{Cl}_2$ ):  $\lambda_{\text{max}}$  [nm] ( $\epsilon \cdot 10^3 [\text{L mol}^{-1} \text{cm}^{-1}]$ ) = 394 (8.3), 335 (12.7).

## 2. Crystallographic Details

### Single Crystal X-Ray Structure Determination of Compound 1 and 2

#### **General:**

Data were collected on an X-ray single crystal diffractometer equipped with a CCD detector (Bruker APEX II,  $\kappa$ -CCD), a rotating anode (Bruker AXS, FR591) with  $\text{MoK}_\alpha$  radiation ( $\lambda = 0.71073 \text{ \AA}$ ), and a Montel mirror optic by using the SMART software package.<sup>[1]</sup> The measurements were performed on single crystals coated with perfluorinated ether. The crystals were fixed on the top of a glass fiber (**1**) or of a cactus prickly (Opuntia ficus-india) (**2**) and transferred to the diffractometer. The crystals were frozen under a stream of cold nitrogen. A matrix scan was used to determine the initial lattice parameters. Reflections were merged and corrected for Lorentz and polarization effects, scan speed, and background using SAINT.<sup>[2]</sup> Absorption corrections, including odd and even ordered spherical harmonics were performed using SADABS.<sup>[2]</sup> Space group assignments were based upon systematic absences,  $E$  statistics, and successful refinement of the structures. Structures were solved by direct methods with the aid of successive difference Fourier maps, and were refined against all data using WinGX<sup>[7]</sup> based on SIR-92<sup>[3]</sup> in conjunction with SHELXL-97<sup>[5]</sup>. Unless otherwise noticed, methyl hydrogen atoms were refined as part of rigid rotating groups, with a C–H distance of  $0.98 \text{ \AA}$  and  $U_{\text{iso(H)}} = 1.5 \cdot U_{\text{eq(C)}}$ . Other H atoms were placed in calculated positions and refined using a riding model, with methylene C–H distances of  $0.99 \text{ \AA}$ , and  $U_{\text{iso(H)}} = 1.2 \cdot U_{\text{eq(C)}}$ . If not mentioned otherwise, non-hydrogen atoms were refined with anisotropic displacement parameters. Full-matrix least-squares refinements were carried out by minimizing  $\text{Sw}(F_o^2 - F_c^2)^2$  with SHELXL-97<sup>[5]</sup> weighting scheme. Neutral atom scattering factors for all atoms and anomalous dispersion corrections for the non-hydrogen atoms were taken from *International Tables for Crystallography*.<sup>[4]</sup> Images of the crystal structures were generated by PLATON.<sup>[6]</sup>

**HOLB 6345-123    Compound 1    CCDC 1005247**

Operator:                    \*\*\* Herdtweck \*\*\*

Molecular Formula:         $\text{C}_{13} \text{H}_8 \text{Cl}_3 \text{O}_3 \text{P}_2 \text{Re}$



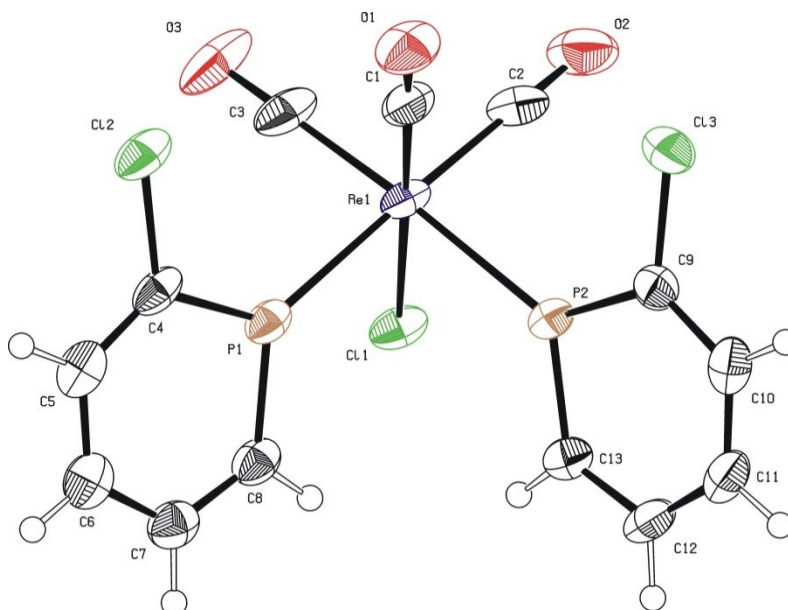

Figure S12. ORTEP style drawing of **1** with 50% ellipsoids.

Crystal Color / Shape      Colorless plate

Crystal Size                      Approximate size of crystal fragment used for data collection:  
 $0.03 \times 0.15 \times 0.28$  mm

Molecular Weight:              566.69 a.m.u.

$F_{000}$ :                                  2128

Systematic Absences:           $hkl: h+k \neq 2n; h0l: l \neq 2n$

Space Group:                      Monoclinic       $C 2/c$               (I.T.-No.: 15)

Cell Constants:                      Least-squares refinement of 9878 reflections with the programs "APEX suite"  
 and "SAINT" [1,2]; theta range  $1.92^\circ < \theta < 25.39^\circ$ ;  $\text{Mo}(\text{K}\alpha)$ ;  $\lambda = 71.073$  pm

$a =$                                   2499.9(3) pm

$b =$                                   978.2(1) pm                       $b =$                                    $121.979(4)^\circ$

$c =$                                   1674.2(2) pm

$V = 3472.8(7) \cdot 10^6 \text{ pm}^3$ ;  $Z = 8$ ;  $D_{\text{calc}} = 2.168 \text{ g cm}^{-3}$ ; Mos. = 0.79

Diffractometer: Kappa APEX II (Area Diffraction System; BRUKER AXS); rotating anode; graphite monochromator; 50 kV; 40 mA;  $\lambda = 71.073$  pm; Mo( $K\alpha$ )

Temperature:  $(-150 \pm 1)^\circ\text{C}$ ;  $(123 \pm 1)$  K

Measurement Range:  $1.92^\circ < \theta < 25.39^\circ$ ; h: -30/30, k: -11/11, l: -20/20

Measurement Time:  $2 \times 5$  s per film

Measurement Mode: measured: 10 runs; 6126 films / scaled: 10 runs; 6126 films  
*j*- and *w*-movement; Increment:  $Dj/Dw = 0.50^\circ$ ;  $dx = 50.0$  mm

LP - Correction: Yes [2]

Intensity Correction No/Yes; during scaling [2]

Absorption Correction: Multi-scan; during scaling;  $m = 7.649$  mm<sup>-1</sup> [2]  
 Correction Factors:  $T_{\min} = 0.4585$   $T_{\max} = 0.7452$

Reflection Data:
 

|        |                                                        |
|--------|--------------------------------------------------------|
| 50625  | reflections were integrated and scaled                 |
| 1766   | reflections systematic absent and rejected             |
| 48859  | reflections to be merged                               |
| 3191   | independent reflections                                |
| 0.049  | $R_{\text{int}}$ : (basis $F_o^2$ )                    |
| 3191   | independent reflections (all) were used in refinements |
| 2874   | independent reflections with $I_o > 2s(I_o)$           |
| 99.8 % | completeness of the data set                           |
| 199    | parameter full-matrix refinement                       |
| 16.0   | reflections per parameter                              |

Solution: Direct Methods [3]; Difference Fourier syntheses

Refinement Parameters: In the asymmetric unit:
 

|    |                                                             |
|----|-------------------------------------------------------------|
| 22 | Non-hydrogen atoms with anisotropic displacement parameters |
|----|-------------------------------------------------------------|

Hydrogen Atoms: In the difference map(s) calculated from the model containing all non-hydrogen atoms, not all of the hydrogen positions could be determined from the highest peaks. For this reason, the hydrogen atoms were placed in

calculated positions ( $d_{C-H} = 95$  pm). Isotropic displacement parameters were calculated from the parent carbon atom ( $U_H = 1.2 U_C$ ). The hydrogen atoms were included in the structure factor calculations but not refined.

|                              |                                                                                                                       |          |
|------------------------------|-----------------------------------------------------------------------------------------------------------------------|----------|
| Atomic Form Factors:         | For neutral atoms and anomalous dispersion [4]                                                                        |          |
| Extinction Correction:       | no                                                                                                                    |          |
| Weighting Scheme:            | $w^{-1} = s^2(F_o^2) + (a * P)^2 + b * P$<br>with a: 0.0143; b: 20.3696; P: [Maximum(0 or $F_o^2$ ) + 2 * $F_c^2$ ]/3 |          |
| Shift/Err:                   | Less than 0.001 in the last cycle of refinement:                                                                      |          |
| Resid. Electron Density:     | +1.30 eÅ <sup>-3</sup> ; -0.80 eÅ <sup>-3</sup>                                                                       |          |
| R1:                          | $S( F_o  -  F_c ) /  F_o $                                                                                            |          |
| [ $F_o > 4s(F_o)$ ; N=2874]: |                                                                                                                       | = 0.0211 |
| [all reflctns; N=3191]:      |                                                                                                                       | = 0.0264 |
| wR2:                         | $[Sw(F_o^2 - F_c^2)^2 / Sw(F_o^2)]^{1/2}$                                                                             |          |
| [ $F_o > 4s(F_o)$ ; N=2874]: |                                                                                                                       | = 0.0474 |
| [all reflctns; N=3191]:      |                                                                                                                       | = 0.0512 |
| Goodness of fit:             | $[Sw(F_o^2 - F_c^2)^2 / (NO - NV)]^{1/2}$                                                                             | = 1.101  |
| Flack's Parameter :          | $x = 0.1(6)$                                                                                                          |          |
| Remarks:                     | Refinement expression $Sw(F_o^2 - F_c^2)^2$                                                                           |          |

### References:

#### Measurements and Data Reduction

- [1] APEX suite of crystallographic software. APEX 2 Version 2008.4. Bruker AXS Inc., Madison, Wisconsin, USA (2008).
- [2] SAINT, Version 7.56a and SADABS Version 2008/1. Bruker AXS Inc., Madison, Wisconsin, USA (2008).

#### Solution

- [3] Altomare, A.; Cascarano, G.; Giacovazzo, C.; Guagliardi, A.; Burla, M. C.; Polidori, G.; Camalli M. "**SIR92**", *J. Appl. Cryst.* **1994**, 27, 435-436.

### Refinement

- [4] International Tables for Crystallography, Vol. C, Tables 6.1.1.4 (pp. 500-502), 4.2.6.8 (pp. 219-222), and 4.2.4.2 (pp. 193-199), Wilson, A. J. C., Ed., Kluwer Academic Publishers, Dordrecht, The Netherlands, 1992.
- [5] Sheldrick, G. M. "**SHELXL-97**", University of Göttingen, Göttingen, Germany, (1998).

### Graphics

- [6] Spek, A. L. "**PLATON**", A Multipurpose Crystallographic Tool, Utrecht University, Utrecht, The Netherlands, (2010).

### Miscellaneous

- [7] L. J. Farrugia, "**WinGX** (Version 1.70.01 January 2005) ", *J. Appl. Cryst.* **1999**, 32, 837-838.

### **HOLA 6344-123    Compound 2 CCDC 1005248**

Operator:                    \*\*\* Herdtweck \*\*\*

Molecular Formula:      C<sub>17</sub> H<sub>12</sub> Cl<sub>4</sub> O<sub>2</sub> P<sub>3</sub> Re

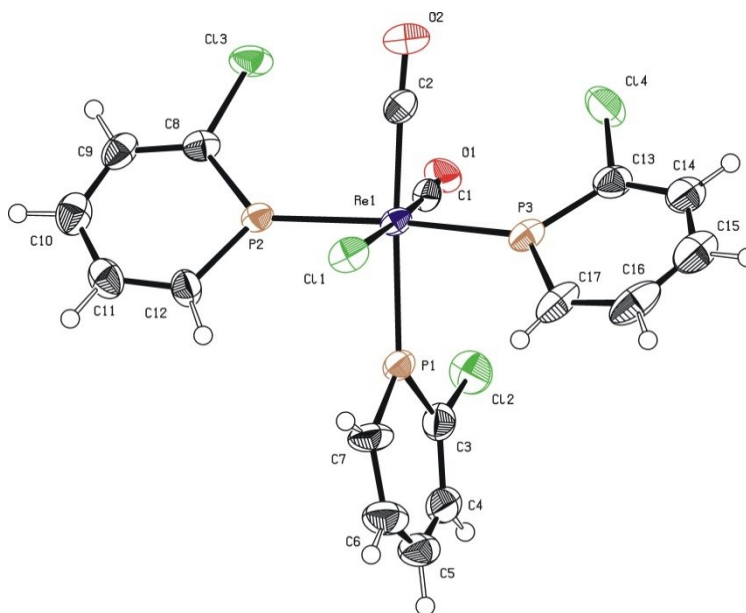

Figure S13. ORTEP style drawing of **2** with 50% ellipsoids.

|                       |                                                                                                                                                                                                                                                                                                                                                                                                   |
|-----------------------|---------------------------------------------------------------------------------------------------------------------------------------------------------------------------------------------------------------------------------------------------------------------------------------------------------------------------------------------------------------------------------------------------|
| Crystal Color / Shape | Yellow fragment                                                                                                                                                                                                                                                                                                                                                                                   |
| Crystal Size          | Approximate size of crystal fragment used for data collection:<br>$0.05 \times 0.10 \times 0.25$ mm                                                                                                                                                                                                                                                                                               |
| Molecular Weight:     | 669.19 a.m.u.                                                                                                                                                                                                                                                                                                                                                                                     |
| $F_{000}$ :           | 1272                                                                                                                                                                                                                                                                                                                                                                                              |
| Systematic Absences:  | 0kl: $k+l \neq 2n$ ; h0l: $h \neq 2n$ ; 00l: $l \neq 2n$                                                                                                                                                                                                                                                                                                                                          |
| Space Group:          | Orthorhombic $Pna2_1$ (I.T.-No.: 33)                                                                                                                                                                                                                                                                                                                                                              |
| Cell Constants:       | Least-squares refinement of 9423 reflections with the programs "APEX suite" and "SAINT" [1,2]; theta range $1.99^\circ < \theta < 25.38^\circ$ ; $\text{Mo}(\text{K}\alpha)$ ; $l = 71.073$ pm<br><br>$a = 1619.81(6)$ pm<br>$b = 1323.31(5)$ pm<br>$c = 987.39(4)$ pm<br><br>$V = 2116.48(14) \cdot 10^6$ pm <sup>3</sup> ; $Z = 4$ ; $D_{\text{calc}} = 2.100$ g cm <sup>-3</sup> ; Mos. = 0.64 |
| Diffractometer:       | Kappa APEX II (Area Diffraction System; BRUKER AXS); rotating anode; graphite monochromator; 50 kV; 40 mA; $l = 71.073$ pm; $\text{Mo}(\text{K}\alpha)$                                                                                                                                                                                                                                           |
| Temperature:          | $(-150 \pm 1)^\circ\text{C}$ ; $(123 \pm 1)$ K                                                                                                                                                                                                                                                                                                                                                    |
| Measurement Range:    | $1.99^\circ < \theta < 25.38^\circ$ ; h: -19/19, k: -15/15, l: -11/11                                                                                                                                                                                                                                                                                                                             |
| Measurement Time:     | $2 \times 5$ s per film                                                                                                                                                                                                                                                                                                                                                                           |
| Measurement Mode:     | measured: 10 runs; 3748 films / scaled: 10 runs; 3748 films<br>$j$ - and $w$ -movement; Increment: $Dj/Dw = 0.50^\circ$ ; $dx = 40.0$ mm                                                                                                                                                                                                                                                          |
| LP - Correction:      | Yes [2]                                                                                                                                                                                                                                                                                                                                                                                           |
| Intensity Correction  | No/Yes; during scaling [2]                                                                                                                                                                                                                                                                                                                                                                        |

Absorption Correction: Multi-scan; during scaling;  $m = 6.484 \text{ mm}^{-1}$  [2]  
 Correction Factors:  $T_{\min} = 0.4929$   $T_{\max} = 0.7452$

Reflection Data:

|        |                                                        |
|--------|--------------------------------------------------------|
| 60767  | reflections were integrated and scaled                 |
| 3192   | reflections systematic absent and rejected             |
| 57575  | reflections to be merged                               |
| 3871   | independent reflections                                |
| 0.052  | $R_{\text{int}}$ : (basis $F_o^2$ )                    |
| 3871   | independent reflections (all) were used in refinements |
| 3785   | independent reflections with $I_o > 2s(I_o)$           |
| 99.9 % | completeness of the data set                           |
| 244    | parameter full-matrix refinement                       |
| 15.9   | reflections per parameter                              |

Solution: Direct Methods [3]; Difference Fourier syntheses

Refinement Parameters: In the asymmetric unit:

|    |                                                             |
|----|-------------------------------------------------------------|
| 27 | Non-hydrogen atoms with anisotropic displacement parameters |
|----|-------------------------------------------------------------|

Hydrogen Atoms: In the difference map(s) calculated from the model containing all non-hydrogen atoms, not all of the hydrogen positions could be determined from the highest peaks. For this reason, the hydrogen atoms were placed in calculated positions ( $d_{\text{C-H}} = 95 \text{ pm}$ ). Isotropic displacement parameters were calculated from the parent carbon atom ( $U_{\text{H}} = 1.2 U_{\text{C}}$ ). The hydrogen atoms were included in the structure factor calculations but not refined.

Atomic Form Factors: For neutral atoms and anomalous dispersion [4]

Extinction Correction: no

Weighting Scheme:  $w^{-1} = s^2(F_o^2) + (a \cdot P)^2 + b \cdot P$   
 with a: 0.0157; b: 4.1046; P:  $[\text{Maximum}(0 \text{ or } F_o^2) + 2 \cdot F_c^2]/3$

Shift/Err: Less than 0.001 in the last cycle of refinement:

Resid. Electron Density: +1.22 eÅ<sup>-3</sup>; -0.66 eÅ<sup>-3</sup>

|                                  |                                             |          |
|----------------------------------|---------------------------------------------|----------|
| R1:                              | $S( F_o  -  F_c )/S F_o $                   |          |
| $[F_o > 4s(F_o); \quad N=3785]:$ |                                             | = 0.0194 |
| $[all\ reflctns; \quad N=3871]:$ |                                             | = 0.0199 |
| wR2:                             | $[Sw(F_o^2 - F_c^2)^2 / Sw(F_o^2)^2]^{1/2}$ |          |
| $[F_o > 4s(F_o); \quad N=3785]:$ |                                             | = 0.0469 |
| $[all\ reflctns; \quad N=3871]:$ |                                             | = 0.0471 |
| Goodness of fit:                 | $[Sw(F_o^2 - F_c^2)^2 / (NO - NV)]^{1/2}$   | = 1.077  |
| Flack's Parameter :              | $x = 0.038(6)$                              |          |
| Remarks:                         | Refinement expression $Sw(F_o^2 - F_c^2)^2$ |          |

The correct enantiomere is proved by Flack's Parameter.

### References:

#### Measurements and Data Reduction

- [1] APEX suite of crystallographic software. APEX 2 Version 2008.4. Bruker AXS Inc., Madison, Wisconsin, USA (2008).
- [2] SAINT, Version 7.56a and SADABS Version 2008/1. Bruker AXS Inc., Madison, Wisconsin, USA (2008).

#### Solution

- [3] Altomare, A.; Cascarano, G.; Giacovazzo, C.; Guagliardi, A.; Burla, M. C.; Polidori, G.; Camalli M. "SIR92", *J. Appl. Cryst.* **1994**, 27, 435-436.

#### Refinement

- [4] International Tables for Crystallography, Vol. C, Tables 6.1.1.4 (pp. 500-502), 4.2.6.8 (pp. 219-222), and 4.2.4.2 (pp. 193-199), Wilson, A. J. C., Ed., Kluwer Academic Publishers, Dordrecht, The Netherlands, 1992.
- [5] Sheldrick, G. M. "SHELXL-97", University of Göttingen, Göttingen, Germany, (1998).

#### Graphics

- [6] Spek, A. L. "PLATON", A Multipurpose Crystallographic Tool, Utrecht University, Utrecht, The Netherlands, (2010).

## **Miscellaneous**

[7]

L. J. Farrugia, "**WinGX** (Version 1.70.01 January 2005) ", *J. Appl. Cryst.* **1999**, 32, 837-838.



### 3. DFT Computed Data

All DFT calculations have been performed by Gaussian09 D.01,<sup>1</sup> optimizations and frequency/thermochemistry determinations have been conducted using the density functional B3LYP<sup>2-4</sup> together with the basis set 6-31+G\*\*<sup>5-8</sup> for all atoms except Re and the Stuttgart 1997 ECP for rhenium,<sup>9</sup> downloaded from the Basis Set Exchange.<sup>10</sup> All obtained geometries have been identified via the numbers of negative frequencies as minima (NImag = 0). All reported energies are unscaled and reported in kJ mol<sup>-1</sup> or eV relatively to a defined zero point. Free energy differences have been calculated for the gas phase in 298.15 K and 1.0 atm. Calculated IR spectra are unscaled and therefore slightly overestimated, the trend, however, corresponds well to observed shifts. A text file of all computed molecule Cartesian coordinates in a format for convenient visualization is included. Calculated bond lengths and angles correspond well to data obtained from the crystal structure. Deviations result from influences in the solid state in single-crystals versus calculations in the gas phase. NBO analysis was carried out in order to discuss the composition of metal – ligand orbitals.<sup>11-17</sup>

### References

- 1 M. J. Frisch, G. W. Trucks, H. B. Schlegel, G. E. Scuseria, M. A. Robb, J. R. Cheeseman, G. Scalmani, V. Barone, B. Mennucci, G. A. Petersson, H. Nakatsuji, M. Caricato, X. Li, H. P. Hratchian, A. F. Izmaylov, J. Bloino, G. Zheng, J. L. Sonnenberg, M. Hada, M. Ehara, K. Toyota, R. Fukuda, J. Hasegawa, M. Ishida, T. Nakajima, Y. Honda, O. Kitao, H. Nakai, T. Vreven, J. A. Montgomery, J. E. P. Jr., F. Ogliaro, M. Bearpark, J. J. Heyd, E. Brothers, K. N. Kudin, V. N. Staroverov, R. Kobayashi, J. Normand, K. Raghavachari, A. Rendell, J. C. Burant, S. S. Iyengar, J. Tomasi, M. Cossi, N. Rega, J. M. Millam, M. Klene, J. E. Knox, J. B. Cross, V. Bakken, C. Adamo, J. Jaramillo, R. Gomperts, R. E. Stratmann, O. Yazyev, A. J. Austin, R. Cammi, C. Pomelli, J. W. Ochterski, R. L. Martin, K. Morokuma, V. G. Zakrzewski, G. A. Voth, P. Salvador, J. J. Dannenberg, S. Dapprich, A. D. Daniels, Ö. Farkas, J. B. Foresman, J. V. Ortiz, J. Cioslowski and D. J. Fox, *Journal*, 2009.
- 2 S. H. Vosko, L. Wilk and M. Nusair, *Canad. J. of Phys.*, 1980, **58**, 1200-1211.
- 3 C. T. Lee, W. T. Yang and R. G. Parr, *Physical Review B*, 1988, **37**, 785-789.
- 4 A. D. Becke, *J. Chem. Phys.*, 1993, **98**, 5648-5652.
- 5 W. J. Hehre, R. Ditchfield and J. A. Pople, *J. Chem. Phys.*, 1972, **56**, 2257–2261.
- 6 M. M. Francl, W. J. Pietro, W. J. Hehre, J. S. Binkley, M. S. Gordon, D. J. Defrees and J. A. Pople, *J. Chem. Phys.*, 1982, **77**, 3654-3665.
- 7 T. Clark, J. Chandrasekhar, G. W. Spitznagel and P. V. R. Schleyer, *J. Comput. Chem.*, 1983, **4**, 294-301.
- 8 P. C. Hariharan and J. A. Pople, *Theoret. Chim. Acta*, 1973, **28**, 213-222.
- 9 D. Andrae, U. Häußermann, M. Dolg, H. Stoll and H. Preuß, *Theoret. Chim. Acta*, 1990, **77**, 123-141.
- 10 K. L. Schuchardt, B. T. Didier, T. Elsethagen, L. Sun, V. Gurumoorthi, J. Chase, J. Li and T. L. Windus, *J. Chem. Inf. Model.*, 2007, **47**, 1045-1052.
- 11 J. P. Foster and F. Weinhold, *J. Am. Chem. Soc.*, 1980, **102**, 7211.
- 12 A. E. Reed and F. Weinhold, *J. Chem. Phys.*, 1983, **78**, 4066.
- 13 A. E. Reed and F. Weinhold, *J. Chem. Phys.*, 1985, **83**, 1736.
- 14 A. E. Reed, R. B. Weinstock and F. Weinhold, *J. Chem. Phys.*, 1985, **83**, 735.
- 15 A. E. Reed, L. A. Curtiss and F. Weinhold, *Chem. Rev.*, 1988, **88**, 899.
- 16 J. E. Carpenter and F. Weinhold, *J. Mol. Struct.: THEOCHEM*, 1988, **169**, 41.
- 17 F. Weinhold and J. Carpenter, in *The Structure of Small Molecules and Ions*, eds. R. Naaman and Z. Vager, Springer US, 1988, ch. 24, pp. 227-236.

## NBO analysis

The relevant compositions of the orbitals are listed in Table S1 – S3 for the precursor [Re((CO)<sub>5</sub>Cl)], **1** and **2**, respectively and illustrate the contribution of both bonding partners in Re–L (L = CO, phosphinine, Cl) to the metal-ligand bond in percent. A (hypothetical) 100% localization corresponds to complete localization of the bonding electrons to the respective atom or group.

Table S1. Relevant compositions of the orbitals of the NBO analysis for ReCO<sub>5</sub>Cl.

| Re–X bond |      | Contribution to the chemical bond |             |             |             |
|-----------|------|-----------------------------------|-------------|-------------|-------------|
|           |      |                                   | s-character | p-character | d-character |
| Re1–C2    | Re1  | 32.73%                            | 18.72%      | 46.73%      | 34.55%      |
|           | C2   | 67.27%                            | 65.78       | 34.22%      | 0.00%       |
| Re1–C4    | Re1  | 30.11%                            | 17.24%      | 49.80%      | 32.96%      |
|           | C4   | 69.89%                            | 66.80%      | 33.20%      | 0.00%       |
| Re1–C6    | Re1  | 30.11%                            | 17.24%      | 49.80%      | 32.96%      |
|           | C6   | 69.89%                            | 66.80%      | 33.20%      | 0.00%       |
| Re1–C8    | Re1  | 30.11%                            | 17.24%      | 49.80%      | 32.96%      |
|           | C8   | 69.89%                            | 66.80%      | 33.20%      | 0.00%       |
| Re1–C11   | Re1  | 30.11%                            | 17.24%      | 49.80%      | 32.96%      |
|           | C11  | 69.89%                            | 66.80%      | 33.20%      | 0.00%       |
| Re1–Cl10  | Re1  | 25.48%                            | 12.85%      | 52.11%      | 35.03%      |
|           | Cl10 | 74.52%                            | 19.92%      | 79.97%      | 0.11%       |

Table S2. Relevant compositions of the orbitals of the NBO analysis for complex **1**.

| Re–X bond |      | Contribution to the chemical bond |             |             |             |
|-----------|------|-----------------------------------|-------------|-------------|-------------|
|           |      |                                   | s-character | p-character | d-character |
| Re11–P12  | R11  | 28.30%                            | 16.05%      | 55.83%      | 28.12%      |
|           | P12  | 71.70%                            | 46.06%      | 53.87%      | 0.07%       |
| Re11–P23  | R11  | 28.44%                            | 15.90%      | 55.70%      | 28.41%      |
|           | P23  | 71.56%                            | 46.13%      | 53.80%      | 0.07%       |
| Re11–C24  | R11  | 32.64%                            | 19.17%      | 43.65%      | 37.18%      |
|           | C24  | 67.36%                            | 65.91%      | 34.09%      | 0.00%       |
| Re11–C26  | R11  | 32.73%                            | 18.99%      | 43.55%      | 37.47%      |
|           | C26  | 67.27%                            | 65.92%      | 34.08%      | 0.00%       |
| Re11–C28  | R11  | 33.48%                            | 18.50%      | 45.03%      | 36.47%      |
|           | C28  | 66.52%                            | 65.83%      | 34.17%      | 0.00%       |
| Re11–Cl30 | R11  | 23.20%                            | 12.20%      | 53.66%      | 34.14%      |
|           | Cl30 | 76.80%                            | 23.63%      | 76.30%      | 0.08%       |

Table S3. Relevant compositions of the orbitals of the NBO analysis for complex **2**.

| Re–X bond |      | Contribution to the |             |             |             |
|-----------|------|---------------------|-------------|-------------|-------------|
|           |      | chemical bond       | s-character | p-character | d-character |
| Re11–P12  | R11  | 31.68%              | 18.77%      | 49.96%      | 31.27%      |
|           | P12  | 68.32%              | 46.37%      | 53.54%      | 0.09%       |
| Re11–P23  | R11  | 28.67%              | 15.38%      | 56.18%      | 28.44%      |
|           | P23  | 71.33%              | 47.30%      | 52.63%      | 0.07%       |
| Re11–P39  | R11  | 31.79%              | 18.54%      | 49.90%      | 31.56%      |
|           | P39  | 68.21%              | 46.51%      | 53.40%      | 0.09%       |
| Re11–C24  | R11  | 33.15%              | 18.47%      | 43.24%      | 38.30%      |
|           | C24  | 66.85%              | 66.08%      | 33.92%      | 0.00%       |
| Re11–C26  | R11  | 34.20%              | 18.20%      | 44.15%      | 37.65%      |
|           | C26  | 65.80%              | 65.95%      | 34.05%      | 0.00%       |
| Re11–Cl28 | R11  | 22.72%              | 11.22%      | 54.47%      | 34.31%      |
|           | Cl28 | 77.28%              | 25.02%      | 74.91%      | 0.06%       |

### Optimized Geometries and HOMO/LUMO pictures of Computed Compounds

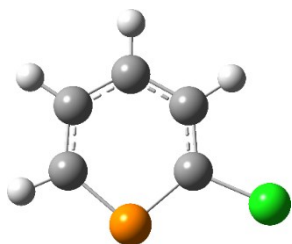

Figure S14. Optimized geometry of 2-chlorophosphinine.

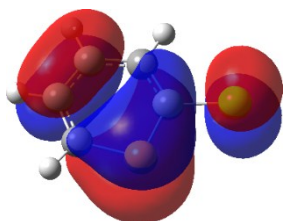

Figure S15. Computed HOMO of 2-chlorophosphinine.

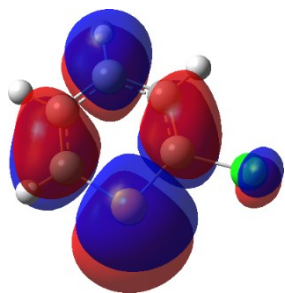

Figure S16. Computed LUMO of 2-chlorophosphinine.

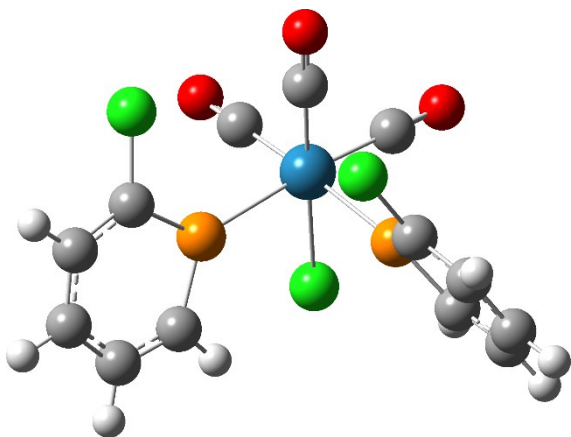

Figure S17. Optimized geometry of **1**.

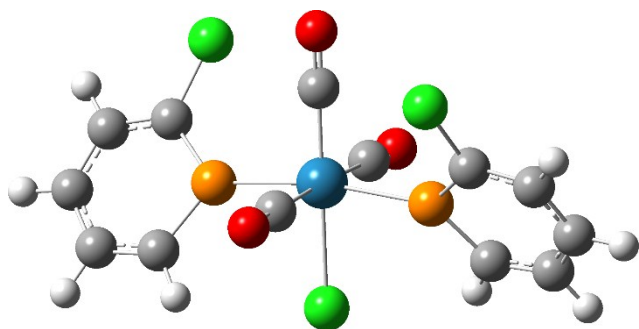

Figure S18. Optimized geometry of computed complex *trans*-[Re(CO)<sub>3</sub>Cl(C<sub>5</sub>H<sub>4</sub>ClP)<sub>2</sub>] (**1a**) featuring *trans*-coordinated 2-chlorophosphinine ligands.

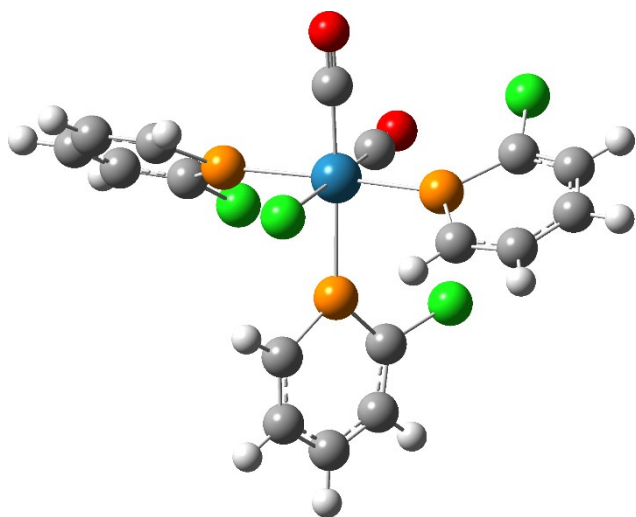

Figure S19. Optimized geometry of **2**.

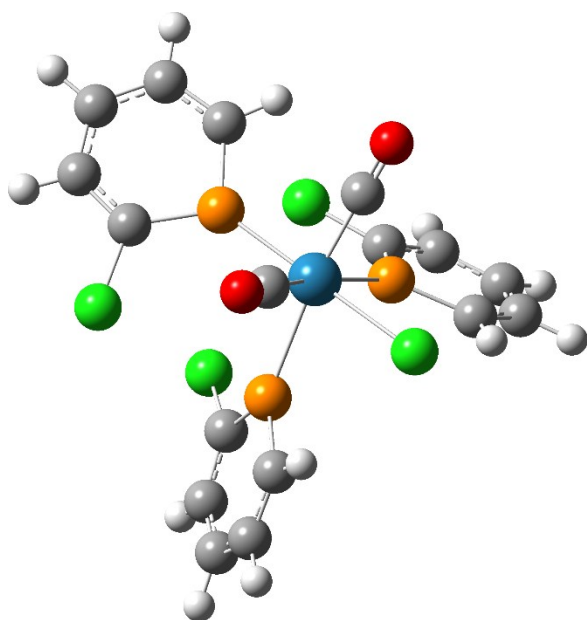

Figure S20. Optimized geometry of computed complex *fac*-[Re(CO)<sub>2</sub>Cl(C<sub>5</sub>H<sub>4</sub>ClP)<sub>3</sub>] (**2a**) featuring *facial*-coordinated 2-chlorophosphinine ligands.
